# Supplementary material
Source: MDPI journal article supplement (https://www.mdpi.com/2504-2289/6/4/140)
Supplement: s1 [file s1]

Archive with 1 entries (1 files):
- BDCC-1918677 supplementary -updated.pdf
